# Supplementary material
Source: PubMed Central journal article supplement (PMC6454313)
Supplement: JZUSB20-0322-ESM.pdf [file JZUSB20-0322-ESM.pdf]

**Regulation of flowering time via miR172-mediated  
*APETALA2-like* expression in ornamental gloxinia  
(*Sinningia speciosa*)<sup>\*#</sup>**

Xiao-yan LI<sup>1,3</sup>, Fu GUO<sup>1</sup>, Sheng-yun MA<sup>1</sup>, Mu-yuan ZHU<sup>1</sup>, Wei-huai PAN<sup>†‡2</sup>, Hong-wu BIAN<sup>†‡1</sup>

**Table S1 Culture medium used in this study**

|                        |                                                   |
|------------------------|---------------------------------------------------|
| Differentiation medium | MS+6-BA 2mg/L+NAA 0.3mg/L                         |
| Selection medium       | MS+6-BA 2mg/L+NAA 0.3mg/L+hgy 20mg/L+Tim 160 mg/L |
| Root-inducing medium   | 1/2 MS+NAA 0.2mg/L+sugar 2%                       |

**Table S2 Primers used in the experiments**

|                   | <b>Primer</b>                               |
|-------------------|---------------------------------------------|
| MIM172-I          | CTTACGTCGTAGTAGGAGTTCTAAGATTTCTAGAGGGAGATAA |
| MIM172-II         | AATCTTAGAACTCCTACTACGACGTAAGCTTCGGTCCCTCG   |
| miR172a-Stem      | GTTGGCTCTGGTGCAGGGTCCGAGGTATTCGCACCAGAGCCA  |
| -loop primer      | ACATGCAG                                    |
| miR172a Forward   | GCGGCGGAGAATCTTGATG                         |
| miR156a-Stem      | GTTGGCTCTGGTGCAGGGTCCGAGGTATTCGCACCAGAGCCA  |
| -loop primer      | ACGTGCTC                                    |
| miR156a Forward   | GCGGCGGTGACAGAAGAGAG                        |
| UPM               | GTGCAGGGTCCGAGGT                            |
| SsU6-UP           | GACATCCGATAAAATTGGAACGATA                   |
| SsU6-DN           | ATTTTGACCATTCTCGATTGT                       |
| SsActin-qRT-UP    | TTCTCCTTTACATCACGAACAATTT                   |
| SsActin-qRT-DN    | ATCCAGGCTGTCCTTTCATTGTAT                    |
| SsAP2-like-qRT-UP | CAGCCGCCCGTGCATATGATAGG                     |
| SsAP2-like-qRT-DN | GAATTGGCCATTCTAGCTTCCC                      |

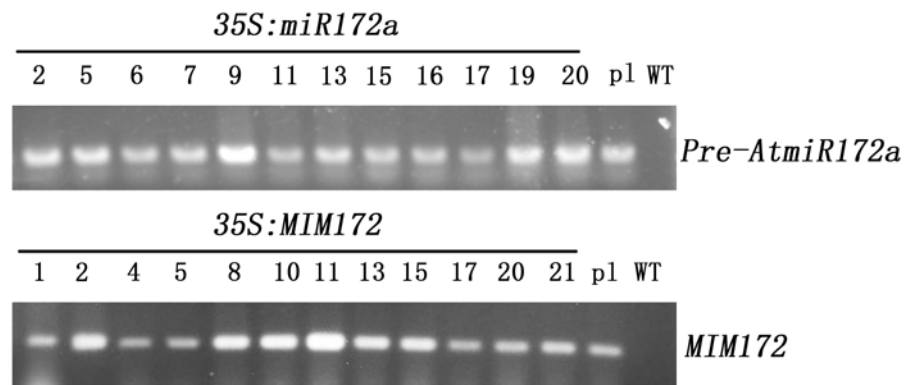

**Fig. S1** PCR analysis of *Pre-AtmiR172a* and *MIM172* (*35S:MIM172*) in transgenic glaxinias

**Data S1 Nucleotide sequence of *SsAP2-like***

ATGAAAAGGGTAAACGGGTCGGATCGGTGTCAAATTCAAGCTCATCGGCG  
GTGGTTATTGAGGATGGTTCAGAGGAAGAAGATGCGGAAAGGGCAGGTGG  
AAGGAAGAGGAGCAGCAAATCTTTGGATTTTCTGTGGCTCATAACCATGT  
AGATGATGAAACAGGTACAGGCTCATCACCGGTGACGAGGCAATTTTTTCC  
GGTGGATGAGGCTGAAATGAGAGGCGGGGAGCCTCCCAATTTTCCCAGGG  
CTCACTGGGTGGAGTACAATTCTGCAAGTCTGAACCTCAAACGGCGGT  
GGCAACTCCGTCTCGGGGAAGTCGGTAGCAGATATGTCACAGCCTCTCAAG  
AAGAGCCGCCGCGGACCTAGGTCCCGGAGCTCCAGTATCGCGGCGTAC  
TTTTTACCGGAGA ACTGGTCGCTGGGAGTCCCACATATGGGATTGCGGGAA  
ACAAGTTTATTTAGGTGGATTGATACGGCACATGCAGCCGCCCGTGCATA  
TGATAGGGCAGCCATTAATTGAGAGGAGTGAAGCTGACATTA ACTTTAG  
TTTGGAGGATTATGAAGAAGATTTAAAACAGATGAACAATCTAACAAAGGA  
GGAATTTGTGCATGTA CTCCGGAGACAAAGTACTGGTTTTCCAAGAGGAAG  
TTCTAAGTATAGAGGTGTTACTTTGCACAAATGTGGTAGATGGGAAGCTAG  
AATGGGCCAATTCTTAGGCCAAAAGTACGTTTATTTGGGTCTCTTTGATACT  
GAAATTGAAGCTGCAAGGGCTTATGATAAAGCCGCCATAAAATGTAATGGG  
AAAGAAGCTGTTACCAATTTTGAACCCAGCATTTATGAAGAAGAACTCAA  
ACAGCAGCGTCTACATGCAATGCAATGGACCACCACAATCTAGACCTAAGT  
TTGGGGAATTCAGCACCAAAGCCAAACGGGTGCGGTGAGAAATCCGGGGT  
TAGAGATCAGCATTCTTCATCAATGCAATTTGAAGCTGATTGGAGACGCCGT  
GGATTGAGGCCTGAGATTCAGCTTAATTTCCAGCATCAAATGAGTTCAATTG  
ACAATGATCAAATCCTCGTAGAAGAGATAACGGATATAATGAGACAGAAA  
CCTTGCAGCTTCTAAGCCAAACACACCTTCATTCATCCGGCTCATCCAAGAT  
TACTAACGAAATGCATAGAATGGGACA ACTAGGAAAGCAAACGAACCACA  
CATGCTTCAAATGTA CTGTAACACAACGCTTACCTCACAAA ACTATCAATTT  
CCAAGGAGTAACGCCATAACCAATGGTGGCAGTAATATAAGAGGAGAGTTT  
TCTGTTTCAAGAAATGAACAGCAATGGCAAATGAATCAGTCTCAAATGTTT  
GCTACTGCTGCAGCATCATCAGGATCCCACAGGCGCAGATGTTAAGACCC  
CAGAATTGGCTTCAGAAAATGGGATCCA CTCTCATGAGACCCTCATGA
